# Supplementary material
Source: PubMed Central journal article supplement (PMC7141938)
Supplement: BLT-18-130_Supplementary_content.pdf [file BLT-18-130_Supplementary_content.pdf]

ONLINE SUPPLEMENTARY CONTENT

**Figure S1** - Hierarchical clustering analysis of red blood cells exposed to starvation, hyperosmolarity, ionic or temperature stress

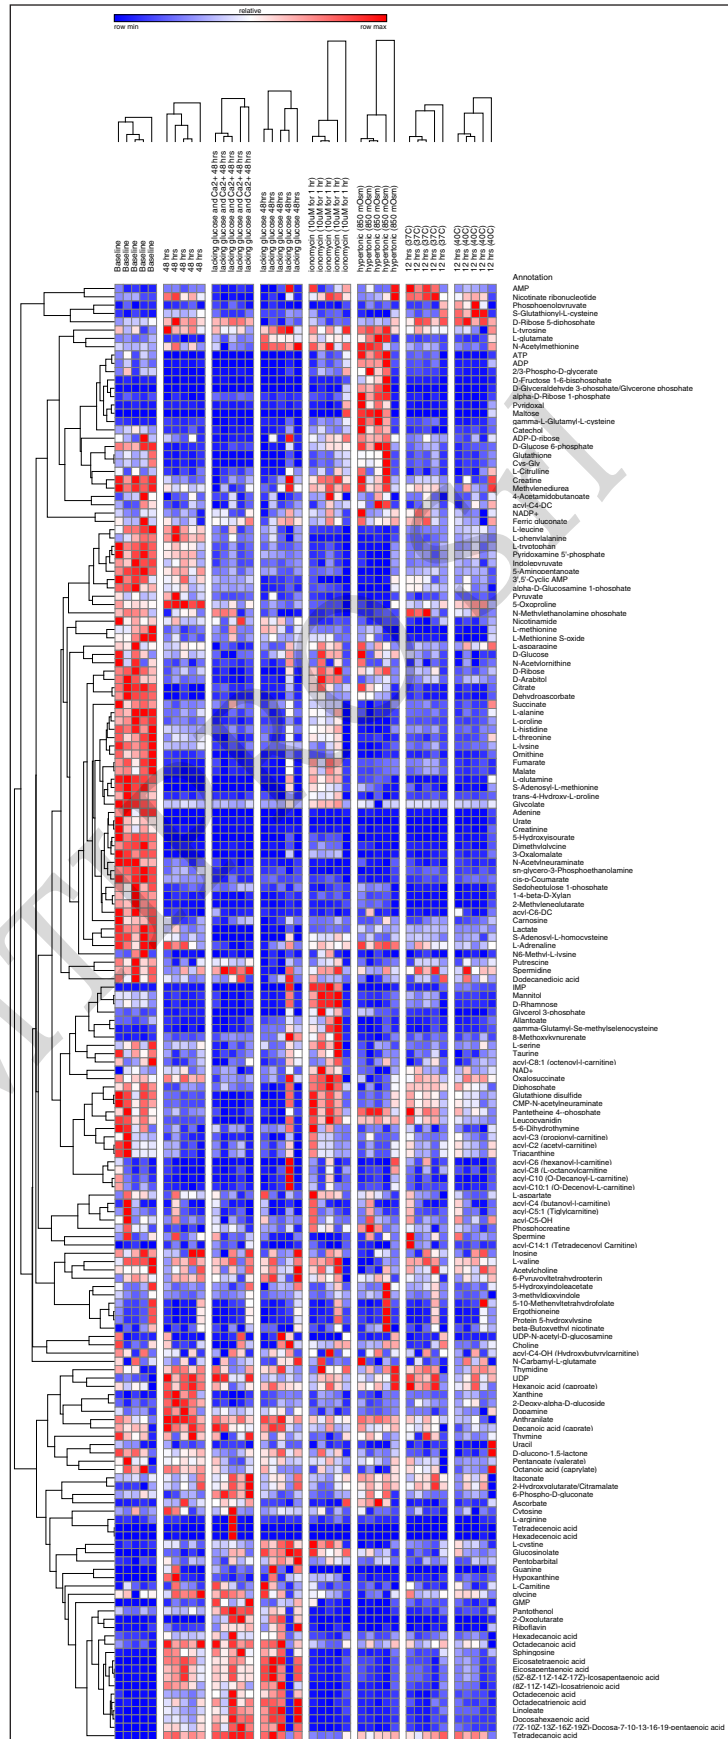

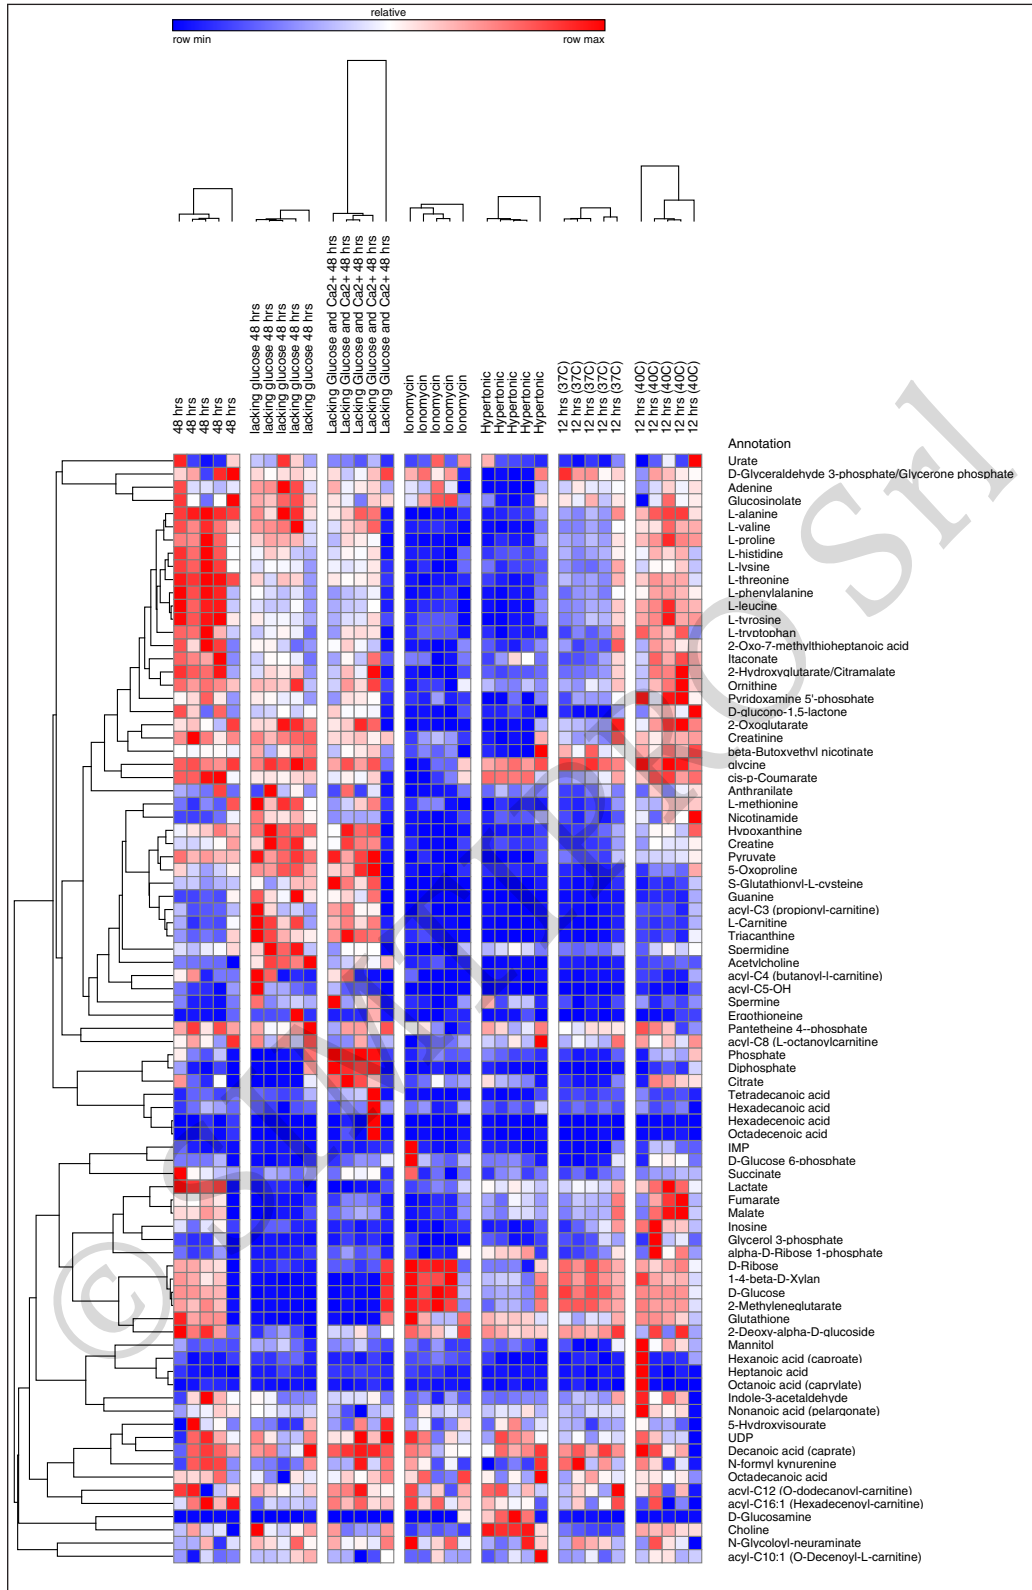

**Figure S2** - Hierarchical clustering analysis of supernatants from red blood cells exposed to starvation, hyperosmolarity, ionic or temperature stress
